# Supplementary material
Source: PubMed Central journal article supplement (PMC2518887)
Supplement: blood-2008-01-136440_1.pdf [file blood-2008-01-136440_1.pdf]

|        | forward              | reverse              |
|--------|----------------------|----------------------|
| PAX-5  | GGAGGAGTGAATCAGCTTGG | GGCTTGATGCTTCCTGTCTC |
| IRF-4  | ACCGAAGCTGGAGGGACTAC | GTGGGGCACAAGCATAAAAG |
| XBP-1* | TCACCCCTCCAGAACATCTC | AAAGGGAGGCTGGTAAGGAA |
| CD40   | CGGCTTCTTCTCCAATGTGT | ACCAAGAGGATGGCAAACAG |

\*primers recognize unspliced and spliced forms of XBP-1 mRNA.
