# Supplementary material
Source: PubMed Central journal article supplement (PMC2518887)
Supplement: blood-2008-01-136440_2.pdf [file blood-2008-01-136440_2.pdf]

|              | forward              | reverse              |
|--------------|----------------------|----------------------|
| <b>CD40</b>  | ATGGATGGGAAGTTGAGACG | TATCCTGGCAGAACCGAAA  |
| <b>PRDM1</b> |                      |                      |
| locus "a"    | TTAGCACACACTCGCTGCTT | TGAGCAGGCTGGATTTCTCT |
| locus "b"    | CTTCCATTTTCCTGCTTGC  | GTGTGTGGGTGGATGTGTGT |
| locus "c"    | TCAACGCTTACTTGGGCTCT | TCCGCCTACAGCCATTTAAG |
| <b>XBPI</b>  |                      |                      |
| locus "a"    | CCCTGTAATCCCAGCACTTT | CACCATGTCCGGCTAATTTT |
| locus "b"    | GTCCTGTGGGTTGGAAAAGA | CGGCTAGAAGACACCTCCAG |
| locus "c"    | ACCCCCGTAATATGCCTGT  | GCACCCCTAGAACCTGGAAT |
| locus "d"    | TCTGGGTTGGAGGGGAATAC | GAAGCGGGAGGTTCACTTG  |
| locus "e"    | GTTTCAGGACCGTGGCTATG | AATCCGTTTGTGGAGGACAC |

Primer pairs were checked for specificity by melting curve analysis and gel electrophoresis. Primer efficiencies were determined by template dilution and were highly similar.
